# Supplementary material for: Improved reliability of serological tools for the diagnosis of West Nile fever in horses within Europe
Source: PubMed Central journal article supplement (PMC5617233; doi:10.1371/journal.pntd.0005936), 2017-09-15
Supplement: pntd.0005936.s001.pdf [file pntd.0005936.s001.pdf]

S1 File: Participating laboratories in the 2010 and 2013 WNV ILPT

| Institute (NRLs)                                                               | Country         | 2010 |      |     |     |     | 2013 |     |     |
|--------------------------------------------------------------------------------|-----------------|------|------|-----|-----|-----|------|-----|-----|
|                                                                                |                 | 2010 | 2013 | IgG | IgM | VNT | IgG  | IgM | VNT |
| AGES IVET-Mödling Institute for Veterinary Disease Control Mödling             | Austria         | x    | x    | x   |     | x   | x    | x   | x   |
| CODA-CERVA                                                                     | Belgium         | x    | x    | x   |     | x   | x    |     | x   |
| National Diagnostic and Research Veterinary Medical Institute                  | Bulgaria        | x    |      | x   |     | x   |      |     |     |
| Faculty of Veterinary Medicine                                                 | Croatia         |      | x    |     |     |     | x    | x   |     |
| Department of Virology                                                         | Czech Republic  | x    | x    | x   |     |     | x    |     |     |
| National Veterinary Institute, Technical University of Denmark (DTU-Vet)       | Denmark         | x    | x    | x   |     |     | x    |     |     |
| Finnish Food Safety Authority Evira                                            | Finland         |      | x    |     |     |     | x    | x   |     |
| ANSES                                                                          | France          | x    | x    | x   | x   | x   | x    | x   | x   |
| Friedrich-Loeffler Institut, Federal Research Institute for Animal Health      | Germany         | x    | x    | x   | x   | x   | x    | x   | x   |
| Ministry of Rural development and Food, Athens Center of veterinary Institutes | Greece          |      | x    |     |     |     | x    | x   |     |
| Central Veterinary Research Laboratory                                         | Ireland         | x    | x    | x   |     |     | x    |     |     |
| Istituto Zooprofilattico Sperimentale dell'Abruzzo e Molise , "G.Caporale"     | Italy           | x    | x    | x   | x   | x   | x    | x   | x   |
| National Food and Veterinary Risk Assessment Institute                         | Lithuania       |      | x    |     |     |     | x    |     |     |
| National Veterinary Research Institute (NVRI)                                  | Poland          |      | x    |     |     |     |      | x   |     |
| Instituto nacional de investigação agrária e veterinária (INIAV)               | Portugal        | x    | x    | x   |     | x   | x    |     | x   |
| Institute for Diagnosis and Animal Health                                      | Romania         | x    | x    | x   |     |     | x    |     |     |
| State Veterinary Institute Zvolen                                              | Slovakia        | x    | x    | x   |     |     | x    | x   |     |
| NRL for Equine diseases                                                        | Slovenia        | x    | x    | x   |     |     | x    | x   |     |
| Laboratorio Central De Veterinaria                                             | Spain           | x    | x    | x   |     | x   | x    | x   | x   |
| SVA National Veterinary Institute                                              | Sweden          | x    | x    | x   |     |     | x    | x   |     |
| Wageningen Bioveterinary Research                                              | The Netherlands | x    | x    | x   | x   |     | x    | x   |     |
| Animal and Plant Health Agency                                                 | United Kingdom  | x    | x    | x   |     |     | x    |     |     |
| <b>Other European participants</b>                                             |                 |      |      |     |     |     |      |     |     |
| Irish Equine Center                                                            | Ireland         | x    | x    | x   | x   |     | x    | x   |     |

|                                                                                    |                        |   |   |   |   |  |   |   |   |
|------------------------------------------------------------------------------------|------------------------|---|---|---|---|--|---|---|---|
| CIRAD Guadeloupe site de Duclos                                                    | France                 |   | x |   |   |  | x |   |   |
| Labeo Frank Duncombe                                                               | France                 |   | x |   |   |  | x | x |   |
| Robert Koch Institute                                                              | Germany                |   | x |   |   |  |   |   | x |
| Istituto Zooprofilattico Sperimentale Del Lazio E Toscana                          | Italy                  | x | x | x | x |  |   | x |   |
| Istituto Zooprofilattico Sperimentale delle Venezie, Padova                        | Italy                  |   | x |   |   |  |   | x |   |
| Istituto Zooprofilattico Sperimentale della Lombardia e Dell'Emilia Romagna IZSLER | Italy                  |   | x |   |   |  | x | x |   |
| CReSA (Centre de Recerca en Sanitat Animal)                                        | Spain                  |   | x |   |   |  | x | x |   |
| CISA-INIA (Centro de Investigación en Sanidad Animal)                              | Spain                  |   | x | x |   |  | x | x | x |
| <b>Mediterranean and Balkan NRLs</b>                                               |                        |   |   |   |   |  |   |   |   |
| Veterinary Institute, University of Sarajevo                                       | Bosnia and Herzegovina |   | x |   |   |  |   | x |   |
| Biopharma                                                                          | Morocco                | x | x | x |   |  | x | x |   |
| <b>Kit manufacturers</b>                                                           |                        |   |   |   |   |  |   |   |   |
| LSI                                                                                | France                 | x | x | x |   |  | x |   |   |
| IDVET                                                                              | France                 |   | x |   |   |  | x | x |   |
| IDEXX                                                                              | France                 |   | x |   |   |  |   | x |   |
