# Supplementary material for: Improved reliability of serological tools for the diagnosis of West Nile fever in horses within Europe
Source: PubMed Central journal article supplement (PMC5617233; doi:10.1371/journal.pntd.0005936), 2017-09-15
Supplement: pntd.0005936.s002.pdf [file pntd.0005936.s002.pdf]

**S2 file: Results of the 2010 WNV ILPT per participant (IgG, IgM and VNT)**

**2010 IgG results (A-Q : NRLs results )**

|   |                                                  | Negative sample |    |    |    | WNV Duplicate |           | WNV Serial 2-fold dilutions |           |            |             |             | Low WNV    | WNV        | Low WNV Duplicate |            | WNV        |
|---|--------------------------------------------------|-----------------|----|----|----|---------------|-----------|-----------------------------|-----------|------------|-------------|-------------|------------|------------|-------------------|------------|------------|
|   | IgG/competition ELISA                            | S1              | S2 | S3 | S4 | S5 (1/20)     | S6 (1/20) | S7 (1/40)                   | S8 (1/80) | S9 (1/160) | S10 (1/320) | S11 (1/640) | S12 (1/80) | S13 (1/20) | S14 (1/40)        | S15 (1/40) | S16 (1/10) |
| A | *IDScreen WNV-215                                | N               | N  | N  | N  | P             | P         | D                           | N         | N          | N           | N           | N          | P          | N                 | N          | P          |
| A | *IDScreen WNV-145                                | N               | N  | N  | N  | P             | P         | P                           | P         | D          | N           | N           | D          | P          | P                 | P          | P          |
| B | *IDScreen WNV-145                                | N               | N  | N  | N  | P             | P         | P                           | D         | N          | N           | N           | D          | P          | P                 | P          | P          |
| C | *IDScreen WNV -145                               | N               | N  | N  | N  | P             | P         | P                           | P         | N          | N           | N           | D          | P          | P                 | P          | P          |
| D | *IDScreen WNV -145                               | N               | N  | N  | N  | P             | P         | P                           | P         | D          | N           | N           | D          | P          | P                 | P          | P          |
| E | *IDScreen WNV -145                               | N               | N  | N  | N  | P             | P         | P                           | D         | N          | N           | N           | N          | P          | D                 | D          | D          |
| E | In house indirect IgG ELISA, inactivated virions | N               | N  | N  | N  | N             | N         | N                           | N         | N          | N           | N           | N          | P          | N                 | N          | N          |
| F | *IDScreen WNV-145                                | N               | N  | N  | N  | P             | P         | P                           | P         | N          | N           | N           | D          | P          | P                 | P          | P          |
| G | *IDScreen WNV -145                               | N               | N  | N  | N  | P             | P         | P                           | D         | N          | N           | N           | N          | P          | P                 | P          | N          |
| H | *IDScreen WNV-145                                | N               | N  | N  | N  | P***          | P         | P                           | D         | N          | N           | N           | N          | P          | P                 | P          | D          |
| I | *IDScreen WNV-145                                | N               | N  | N  | N  | P             | P         | P                           | P         | N          | N           | N           | D          | P          | P                 | P          | P          |
| J | *IDScreen WNV-215                                | N               | N  | N  | N  | P             | P         | P                           | D         | N          | N           | N           | N          | P          | D                 | D          | P          |
| K | *ID Screen WNV -215                              | N               | N  | N  | N  | P             | P         | P                           | D         | N          | N           | N           | N          | P          | N                 | N          | P          |
| L | *ID Screen WNV -215                              | N               | N  | N  | N  | P             | P         | D                           | D         | N          | N           | N           | N          | P          | D                 | D          | P          |
| M | *ID Screen WNV -215                              | N               | N  | N  | N  | P             | P         | D                           | N         | N          | N           | N           | N          | P          | D                 | N          | P          |
| N | *IDScreen WNV-215                                | N               | N  | N  | N  | P             | P         | D                           | N         | N          | N           | N           | N          | P          | N                 | N          | D          |
| O | *ID Screen WNV -215                              | N               | N  | N  | N  | P             | P         | P                           | D         | N          | N           | N           | N          | P          | N                 | D          | D          |
| P | *ID Screen WNV -215                              | N               | N  | N  | N  | P             | P         | D                           | N         | N          | N           | N           | N          | P          | N                 | N          | P          |
| Q | *IDScreen WNV                                    | N               | N  | N  | N  | P             | P         | P                           | D         | N          | N           | N           | N          | P          | N                 | D          | N          |
| Q | **Ingezim WNV compaq                             | N               | N  | N  | N  | D             | D         | D                           | N         | N          | N           | N           | N          | D          | N                 | N          | N          |
| R | In house                                         | N               | N  | N  | N  | P             | P         | P                           | D         | D          | D           | N           | N          | P          | P                 | P          | N          |
| S | *IDScreen WNV-215                                | N               | N  | N  | N  | P             | P         | D                           | N         | N          | N           | N           | N          | P          | N                 | N          | D          |
| T | *IDScreen WNV-215                                | N               | N  | N  | N  | P             | P         | P                           | P         | D          | N           | N           | N          | P          | P                 | P          | P          |
| U | In house competition ELISA, inactivated virions  | N               | P  | N  | N  | P             | P         | N                           | N         | N          | N           | N           | N          | P          | N                 | N          | P          |

**ILPT accepted results**

N N N N P P P/D P/D/N P/D/N N N P/D/N P P/D/N P/D/N P/D

\* ID screen WNV competition kit (IDVet)

N: negative; P: positive, D: doubtful

In grey : unsatisfactory results

\*\*\* Differing results on duplicate samples

\*\* Ingezim WNV Compaq kit (Ingenasa)

**2010 VNT results (NRLs results)**

|                              | Method                                  | Negative sample |    |    |    | WNV Duplicate |           | WNV Serial 2-fold dilutions |           |            |             |             |            | Low WNV    | WNV        | Low WNV Duplicate |            | WNV |
|------------------------------|-----------------------------------------|-----------------|----|----|----|---------------|-----------|-----------------------------|-----------|------------|-------------|-------------|------------|------------|------------|-------------------|------------|-----|
|                              |                                         | S1              | S2 | S3 | S4 | S5 (1/20)     | S6 (1/20) | S7 (1/40)                   | S8 (1/80) | S9 (1/160) | S10 (1/320) | S11 (1/640) | S12 (1/80) | S13 (1/20) | S14 (1/40) | S15 (1/40)        | S16 (1/10) |     |
| A                            | PRNT 90 (Vero cells, Is98 strain)       | N               | N  | N  | N  | N             | N         | N                           | N         | N          | N           | N           | N          | N          | P          | P                 | N          |     |
| B                            | MNT (Vero cells)                        | N               | N  | N  | N  | N             | N         | N                           | N         | N          | N           | N           | N          | N          | D          | P                 | N          |     |
| E                            | PRNT 90+MNT (Vero cells, Eg 101 strain) | N               | N  | N  | N  | N             | N         | N                           | N         | N          | N           | N           | N          | N          | D          | D                 | N          |     |
| I                            | MNT (Vero cells)                        | N               | N  | N  | N  | N             | N         | N                           | N         | N          | N           | N           | N          | N          | N          | N                 | N          |     |
| K                            | MNT (Vero cells)                        | N               | N  | N  | N  | N             | N         | N                           | N         | N          | N           | N           | N          | N          | P          | P                 | N          |     |
| L                            | MNT (Vero cells)                        | N               | N  | N  | N  | P             | P         | P                           | N         | N          | N           | N           | N          | P          | P          | P                 | N          |     |
| P                            | MNT (Vero cells, NY99 or Ug strains)    | N               | N  | N  | N  | N             | N         | N                           | N         | N          | N           | N           | N          | N          | N          | N                 | N          |     |
| Q                            | MNT (Vero cells)                        | N               | N  | N  | N  | N             | N         | N                           | N         | N          | N           | N           | N          | N          | N          | N                 | N          |     |
| <b>ILPT accepted results</b> |                                         | N               | N  | N  | N  | P/D/N         | P/D/N     | P/D/N                       | N         | N          | N           | N           | N          | N          | P/D/N      | P/D               | P/D        | N   |

N: negative; P: positive, D: doubtful

In grey : unsatisfactory results

**2010 IgM results (A-K : NRLs results )**

|                              | Kits                  | Negative sample |    |    |    | WNV Duplicate |           | WNV Serial 2-fold dilutions |           |            |             |             |            | Low WNV    | WNV        | Low WNV Duplicate |            | WNV |
|------------------------------|-----------------------|-----------------|----|----|----|---------------|-----------|-----------------------------|-----------|------------|-------------|-------------|------------|------------|------------|-------------------|------------|-----|
|                              |                       | S1              | S2 | S3 | S4 | S5 (1/20)     | S6 (1/20) | S7 (1/40)                   | S8 (1/80) | S9 (1/160) | S10 (1/320) | S11 (1/640) | S12 (1/80) | S13 (1/20) | S14 (1/40) | S15 (1/40)        | S16 (1/10) |     |
| A                            | in house IgM ELISA    | N               | N  | N  | N  | N             | N         | N                           | N         | N          | N           | N           | N          | N          | P          | P                 | N          |     |
| E                            | *IDEXX WNV IgM        | N               | N  | N  | N  | N             | N         | N                           | N         | N          | N           | N           | N          | N          | P          | P                 | N          |     |
| F                            | *IDEXX WNV IgM - 149  | N               | N  | N  | N  | N             | N         | N                           | N         | N          | N           | N           | N          | N          | P          | P                 | N          |     |
| K                            | *IDEXX WNV IgM - 0053 | N               | N  | N  | N  | N             | N         | N                           | N         | N          | N           | N           | N          | N          | P          | P                 | N          |     |
| R                            | *IDEXX WNV IgM - 0053 | N               | N  | N  | N  | N             | N         | N                           | N         | N          | N           | N           | N          | N          | P          | P                 | N          |     |
| T                            | in house IgM ELISA    | N               | N  | N  | N  | N             | N         | N                           | N         | N          | N           | N           | N          | N          | P          | P                 | N          |     |
| <b>ILPT accepted results</b> |                       | N               | N  | N  | N  | N             | N         | N                           | N         | N          | N           | N           | N          | N          | P          | P                 | N          |     |

\*IDEXX IgM WNV Ab kit N: negative; P: positive, D: doubtful
