# Supplementary material for: Improved reliability of serological tools for the diagnosis of West Nile fever in horses within Europe
Source: PubMed Central journal article supplement (PMC5617233; doi:10.1371/journal.pntd.0005936), 2017-09-15
Supplement: pntd.0005936.s003.pdf [file pntd.0005936.s003.pdf]

**S3 file: Results of the 2013 WNV ILPT per participant (IgG, IgM and VNT)**

**2013 IgG results (A-Y: NRLs results)**

| 2013 code number | kits                                                      | Negative | Kinetics of WNV lineage 1 antibody response |          |          | WNV Duplicate |          | Serial dilutions |           |           |             |             |             | Related flaviviruses |         |          |
|------------------|-----------------------------------------------------------|----------|---------------------------------------------|----------|----------|---------------|----------|------------------|-----------|-----------|-------------|-------------|-------------|----------------------|---------|----------|
|                  |                                                           | S1       | S2 8dpi                                     | S3 21dpi | S4 35dpi | S5 (1/6)      | S6 (1/6) | S7 (1/6)         | S8 (1/24) | S9 (1/48) | S10 (1/384) | S11 (1/384) | S12 (1/536) | S13 USUV             | S14 JEV | S15 TBEV |
| A                | *ID Screen WNV -460                                       | N        | N                                           | P        | P        | P             | P        | P                | P         | P         | N           | N           | N           | P                    | P       | P        |
| B                | *ID Screen WNV -334                                       | N        | N                                           | P        | P        | P             | P        | P                | P         | P         | N           | N           | N           | P                    | P       | P        |
| C                | *ID Screen WNV -334                                       | N        | N                                           | P        | P        | P             | P        | P                | P         | P         | N           | N           | N           | P                    | P       | P        |
| D                | *ID Screen WNV -334                                       | N        | N                                           | P        | P        | P             | P        | P                | P         | P         | N           | N           | N           | P                    | P       | P        |
| E                | *ID Screen WNV -460                                       | N        | N                                           | P        | P        | P             | P        | P                | P         | P         | N           | N           | N           | P                    | P       | P        |
| E                | In house WNV indirect ELISA, inactivated virions          | N        | N                                           | P        | P        | P             | P        | P                | D         | P         | N           | N           | N           | N                    | N       | N        |
| F                | *ID Screen WNV -334                                       | N        | N                                           | P        | P        | P             | P        | P                | P         | P         | N           | N           | N           | P                    | P       | P        |
| G                | *ID Screen WNV -334                                       | N        | N                                           | P        | P        | P             | P        | P                | P         | P         | N           | N           | N           | P                    | P       | P        |
| H                | *ID Screen WNV -145                                       | N        | D                                           | P        | P        | P             | P        | P                | P         | P         | N           | N           | N           | P                    | P       | P        |
| I                | ** Ingezim West Nile -210213                              | N        | P                                           | P        | P        | P             | P        | P                | P         | P         | N           | N           | N           | P                    | P       | N        |
| I                | *ID Screen WNV -334                                       | N        | N                                           | P        | P        | P             | P        | P                | P         | P         | N           | N           | N           | P                    | P       | P        |
| J                | *ID Screen WNV -460                                       | N        | N                                           | P        | P        | P             | P        | P                | P         | P         | N           | N           | N           | P                    | P       | P        |
| K                | *ID Screen WNV -460                                       | N        | N                                           | P        | P        | P             | P        | P                | P         | P         | N           | N           | N           | P                    | P       | P        |
| L                | **Ingezim West Nile -70812                                | N        | P                                           | P        | P        | P             | P        | P                | P         | P         | N           | N           | N           | D                    | P       | N        |
| M                | *ID Screen WNV -334                                       | N        | N                                           | P        | P        | P             | P        | P                | P         | P         | N           | N           | N           | P                    | P       | P        |
| N                | *ID Screen WNV -460                                       | N        | N                                           | P        | P        | P             | P        | P                | P         | P         | N           | N           | N           | P                    | P       | P        |
| O                | *ID Screen WNV -334                                       | N        | N                                           | P        | P        | P             | P        | P                | P         | P         | N           | N           | N           | P                    | P       | P        |
| P                | *ID Screen WNV -334                                       | N        | N                                           | P        | P        | P             | P        | P                | P         | P         | N           | N           | N           | P                    | P       | P        |
| V                | *ID Screen WNV -334                                       | N        | N                                           | P        | P        | P             | P        | P                | P         | P         | N           | N           | N           | P                    | P       | P        |
| W                | *ID Screen WNV -334                                       | N        | N                                           | P        | P        | P             | P        | P                | D         | P         | N           | N           | N           | P                    | P       | P        |
| X                | *ID Screen WNV -334                                       | N        | N                                           | P        | P        | P             | P        | P                | P         | P         | N           | N           | N           | P                    | P       | P        |
| Y                | *ID Screen WNV -460                                       | N        | N                                           | P        | P        | P             | P        | P                | P         | P         | N           | N           | N           | P                    | P       | P        |
| AA               | *ID Screen WNV -460                                       | N        | N                                           | P        | P        | P             | P        | P                | P         | P         | N           | N           | N           | D                    | P       | D        |
| AB               | In house competition ELISA, inactivated cell supernatants | N        | P                                           | P        | P        | P             | P        | P                | P         | P         | N           | N           | N           | N                    | N       | N        |
| AC               | *ID Screen WNV -460                                       | N        | N                                           | P        | P        | P             | P        | P                | P         | P         | N           | N           | N           | P                    | P       | P        |
| AD               | In house NS1 inhibition ELISA                             | N        | N                                           | P        | P        | P             | P        | P                | P         | P         | N           | N           | N           | N                    | P       | N        |
| AE               | **Ingezim West Nile -70812                                | N        | P                                           | P        | P        | P             | P        | P                | P         | P         | N           | N           | N           | D                    | P       | N        |
| AF               | *ID Screen WNV -334                                       | N        | N                                           | P        | P        | P             | P        | P                | P         | P         | N           | N           | N           | P                    | P       | P        |
| AG               | *ID Screen WNV -460                                       | N        | N                                           | P        | P        | P             | P        | P                | P         | P         | N           | N           | N           | P                    | P       | P        |
| AH               | *ID Screen WNV -460                                       | N        | N                                           | P        | P        | P             | P        | P                | P         | P         | N           | N           | N           | P                    | P       | P        |
| AI               | *ID Screen WNV -460                                       | N        | D                                           | P        | P        | P             | P        | P                | P         | P         | N           | N           | N           | P                    | P       | P        |

**ILPT accepted results**      N      P/D/N      P      P      P      P      P      P      P      P      N      N      N      P/D/N      P/D/N      P/D/N  
 \* ID screen WNV competition kit (IDVet)      N: negative; P: positive, D: doubtful  
 \*\* Ingezim WNV Compaq kit (Ingenasa)      In grey : unsatisfactory results

2013 IgM results (A-Z: NRLs results)

| 2013 code number | Kits                                  | Negative | Kinetics of WNV lineage 1 antibody response |          |          | WNV Duplicate |          | Serial dilutions |           |           |             |             |             | Related flaviviruses |         |          |
|------------------|---------------------------------------|----------|---------------------------------------------|----------|----------|---------------|----------|------------------|-----------|-----------|-------------|-------------|-------------|----------------------|---------|----------|
|                  |                                       | S1       | S2 8dpi                                     | S3 21dpi | S4 35dpi | S5 (1/6)      | S6 (1/6) | S7 (1/6)         | S8 (1/24) | S9 (1/48) | S10 (1/384) | S11 (1/384) | S12 (1/536) | S13 USUV             | S14 JEV | S15 TBEV |
| A                | *ID Screen West Nile IgM Capture -438 | N        | P                                           | P        | P        | N             | N        | P                | N         | N         | N           | N           | N           | N                    | N       | N        |
| E                | **IDEXX IgM WNV Ab test -2227         | N        | P                                           | P        | N        | N             | N        | P                | D         | D         | N           | N           | N           | N                    | N       | N        |
| G                | *ID Screen West Nile IgM -438         | N        | P                                           | P        | N        | N             | N        | P                | N         | N         | N           | N           | N           | N                    | N       | N        |
| I                | **IDEXX IgM WNV Ab test -3071         | N        | P                                           | P        | D        | N             | N        | P                | D         | D         | N           | N           | N           | N                    | N       | N        |
| K                | **IDEXX IgM WNV Ab test -2227         | N        | P                                           | P        | D        | N             | N        | P                | N         | D         | N           | N           | N           | N                    | N       | N        |
| L                | **IDEXX IgM WNV Ab test -2227         | N        | P                                           | P        | D        | N             | N        | P                | D         | N         | N           | N           | N           | N                    | N       | N        |
| N                | *ID Screen West Nile IgM -438         | N        | P                                           | P        | N        | N             | N        | P                | N         | N         | N           | N           | N           | N                    | N       | N        |
| O                | **IDEXX IgM WNV Ab test -2227         | N        | P                                           | P        | D        | N             | N        | P                | D         | N         | N           | N           | N           | N                    | N       | N        |
| P                | *ID Screen West Nile IgM -438         | N        | P                                           | P        | D        | N             | N        | P                | N         | N         | N           | N           | N           | N                    | N       | N        |
| V                | *ID Screen West Nile IgM -438         | N        | P                                           | P        | P        | N             | N        | P                | N         | N         | N           | N           | N           | N                    | N       | N        |
| W                | *ID Screen West Nile IgM -438         | N        | P                                           | P        | N        | N             | N        | P                | N         | N         | N           | N           | N           | N                    | N       | N        |
| X                | *ID Screen West Nile IgM -319         | N        | P                                           | P        | N        | N             | N        | P                | N         | N         | N           | N           | N           | N                    | N       | N        |
| Z                | *ID Screen West Nile IgM -668         | N        | P                                           | P        | N        | N             | N        | D                | N         | N         | N           | N           | N           | N                    | N       | N        |
| AI               | *ID Screen West Nile IgM -438         | N        | P                                           | P        | N        | N             | N        | P                | N         | N         | N           | N           | N           | N                    | N       | N        |
| AA               | *ID Screen West Nile IgM -438         | N        | P                                           | P        | D        | N             | N        | P                | N         | N         | N           | N           | N           | N                    | N       | N        |
| AB               | In-house IgM Capture ELISA            | N        | P                                           | P        | D        | N             | N        | P                | N         | N         | N           | N           | N           | N                    | N       | N        |
| AC               | *ID Screen West Nile IgM -438         | N        | P                                           | P        | N        | N             | N        | D                | N         | N         | N           | N           | N           | N                    | N       | N        |
| AE               | ***Ingezim West Nile IgM -0612        | N        | P                                           | P        | P        | P             | P        | P                | P         | P         | N           | N           | N           | N                    | N       | N        |
| AF               | *ID Screen West Nile IgM -319         | N        | P                                           | P        | D        | N             | N        | P                | N         | N         | N           | N           | N           | N                    | N       | N        |
| AG               | *ID Screen West Nile IgM -438         | N        | P                                           | P        | D        | N             | N        | P                | N         | N         | N           | N           | N           | N                    | N       | N        |
| AJ               | *ID Screen West Nile IgM -438         | N        | P                                           | P        | N        | N             | N        | P                | N         | N         | N           | N           | N           | N                    | N       | N        |
| AK               | **IDEXX IgM WNV Ab test -2227         | N        | P                                           | P        | P        | N             | N        | P                | D         | D         | N           | N           | N           | N                    | N       | N        |
| AL               | *ID Screen West Nile IgM -438         | N        | P                                           | P        | N        | N             | N        | N                | N         | N         | N           | N           | N           | N                    | N       | N        |
| AL               | **IDEXX IgM WNV Ab test -3071         | N        | P                                           | P        | P        | N             | N        | P                | N         | D         | N           | N           | N           | N                    | N       | N        |
| AM               | *ID Screen West Nile IgM -668         | N        | P                                           | P        | D        | N             | N        | D                | N         | N         | N           | N           | N           | N                    | N       | N        |

ILPT accepted results

N P P P/D/N P/D/N P/D/N P/D/N P/D/N P/D/N P/D/N N N N N N N

\* ID screen WNV IgM capture kit

N: negative; P: positive, D: doubtful

\*\*IDEXX IgM WNV Ab kit

\*\*\*Ingezim WNV IgM capture Kit

2013 VNT results (A-P: NRLs results)

| 2013 code number |                            | Negative | Kinetics of WNV lineage 1 antibody response |          |          | WNV Duplicate |          | Serial dilutions |           |           |             |             |             | Related flaviviruses |         |          |
|------------------|----------------------------|----------|---------------------------------------------|----------|----------|---------------|----------|------------------|-----------|-----------|-------------|-------------|-------------|----------------------|---------|----------|
|                  |                            | S1       | S2 8dpi                                     | S3 21dpi | S4 35dpi | S5 (1/6)      | S6 (1/6) | S7 (1/6)         | S8 (1/24) | S9 (1/48) | S10 (1/384) | S11 (1/384) | S12 (1/536) | S13 USUV             | S14 JEV | S15 TBEV |
| A                | WNV MNT (Vero, Is98)       | N        | P                                           | P        | P        | P             | P        | P                | P         | P         | N           | N           | N           | N                    | N       | N        |
|                  | USUV MNT (Vero, SAAR 1776) | N        | N                                           | P        | P        | N             | N        | N                | N         | N         | N           | N           | N           | P                    | P       | N        |
|                  | JEV MNT (Vero, Nakayama)   | N        | N                                           | P        | P        | N             | N        | P                | N         | N         | N           | N           | N           | N                    | N       | P        |
|                  | TBEV MNT (Vero, Hypr)      | N        | N                                           | N        | N        | N             | N        | N                | N         | N         | N           | N           | N           | N                    | P       | N        |
| B                | WNV MNT (Vero, Is98)       | N        | N                                           | P        | P        | P             | P        | P                | P         | P         | N           | N           | N           | N                    | N       | N        |
| E                | WNV MNT (Vero, Eg101)      | N        | N                                           | P        | P        | P             | P        | P                | P         | P         | N           | N           | N           | N                    | N       | N        |
| I                | WNV MNT (Vero, Eg101)      | N        | N                                           | N        | P        | D             | D        | N                | N         | N         | N           | N           | N           | N                    | N       | N        |
| K                | WNV MNT (Vero, NY99)       | N        | P                                           | P        | P        | P             | P        | P                | P         | P         | N           | N           | N           | N                    | N       | N        |
| L                | WNV MNT (Vero, Eg101)      | N        | N                                           | P        | P        | P             | P        | P                | P         | P         | N           | N           | N           | N                    | N       | N        |
| P                | WNV MNT (Vero, NY99)       | N        | N                                           | N        | P        | P             | P        | N                | N         | N         | N           | N           | N           | N                    | N       | N        |
| AN               | WNV MNT (Vero, IS98)       | N        | N                                           | P        | P        | P             | P        | N                | N         | N         | N           | N           | N           | N                    | N       | N        |
| AO               | WNV MNT (Vero, Eg101)      | N        | P                                           | P        | P        | P             | P        | P                | N         | P         | N           | N           | N           | N                    | N       | N        |

ILPT accepted results (WNV)

N P/D/N P P P/D P/D P P/D/N P/D/N N N N N N N

N: negative; P: positive, D: doubtful  
In grey: unsatisfactory results
